# Supplementary material
Source: publisher site journal article supplement (https://www.dovepress.com/article/267994)
Supplement: Supplementary file 1 [file get_supplementary_file.php]

**Supplementary Figure 1.** Changes in glyceimic parameters according to glycated hemoglobin level.

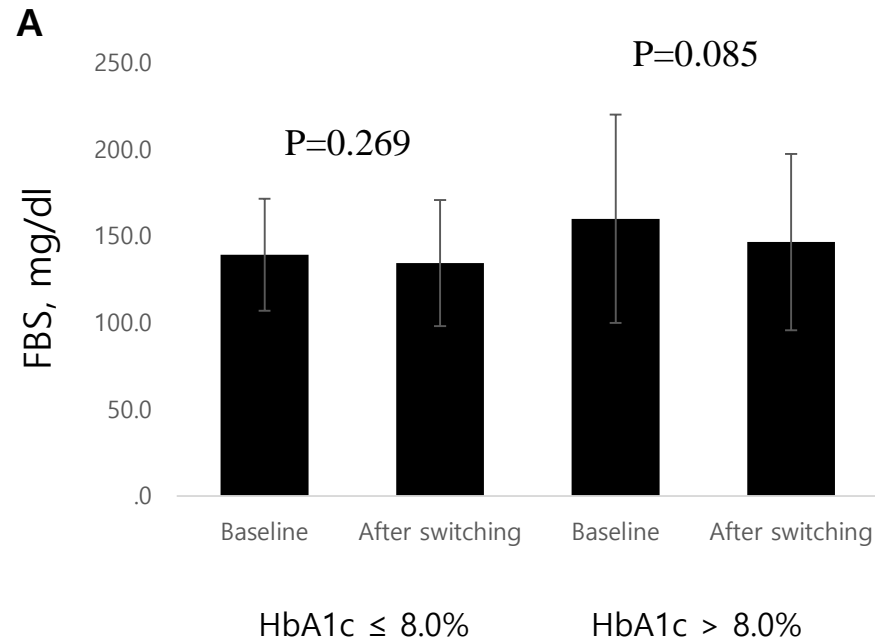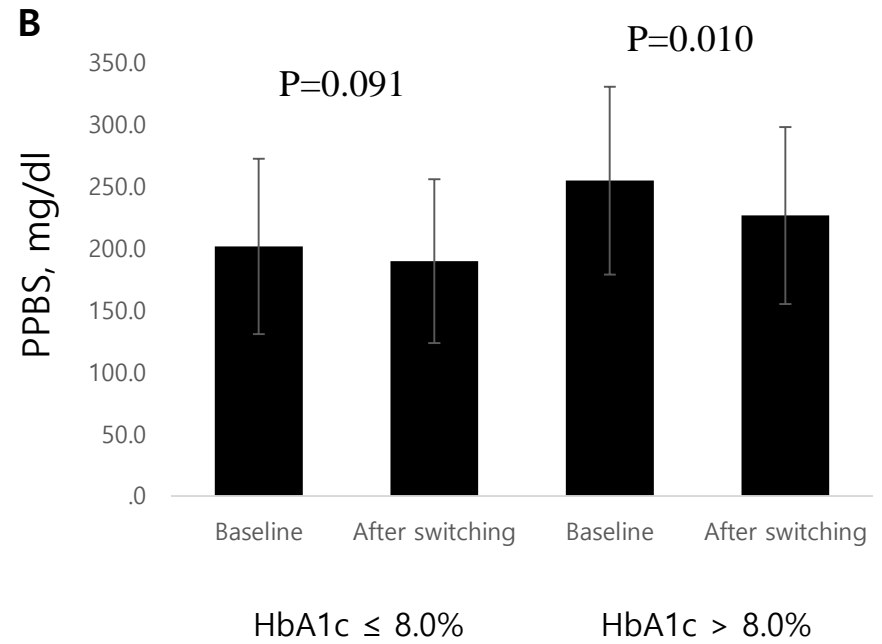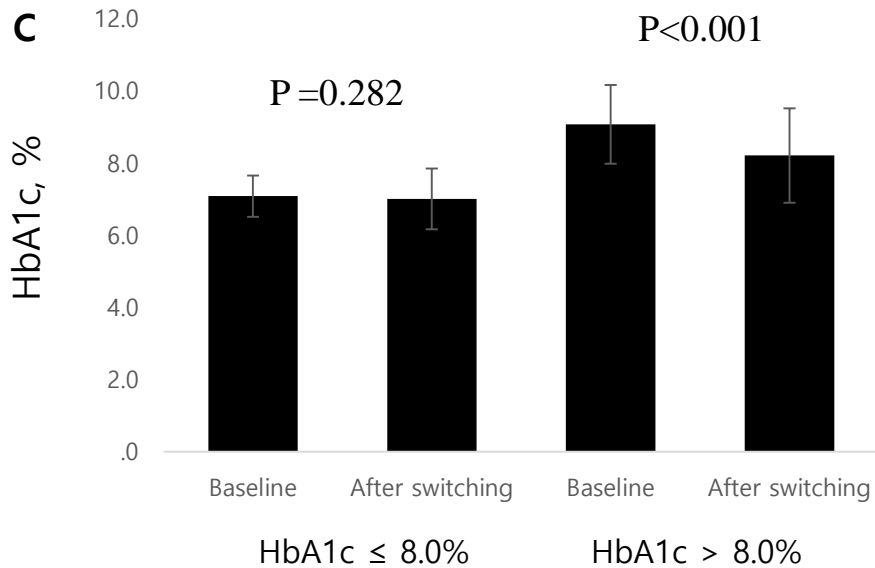

(A) Fasting blood glucose (FBS),  
(B) postprandial blood glucose (PPBS),  
and  
(C) glycated hemoglobin A1c (HbA1c).
